# Supplementary material
Source: bioRxiv or medRxiv preprint supplement (https://medrxiv.org/content/medrxiv/early/2024/05/08/2024.05.06.24306555/DC2/embed/media-2.pdf)

ETA CL MMPK\_SciML (5FU)

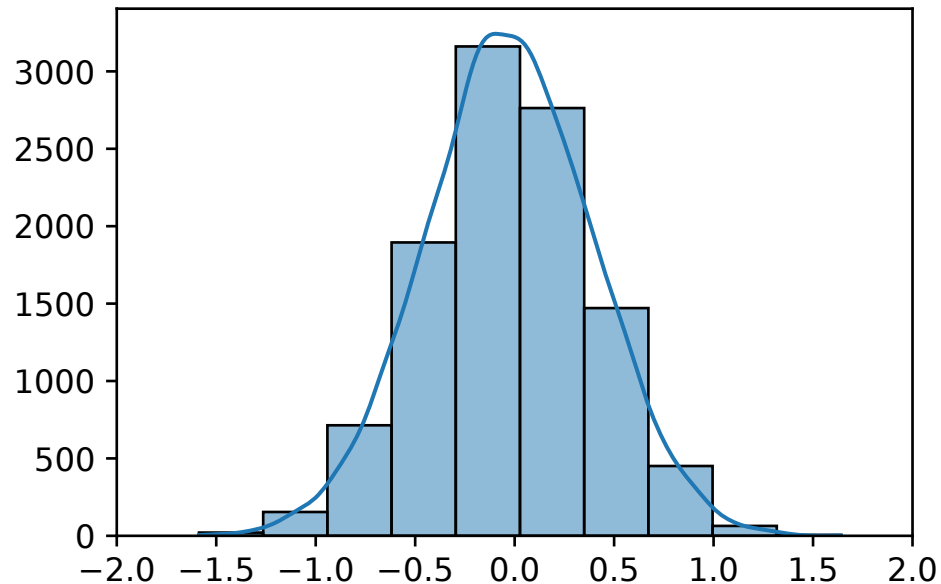

ETA CL MMPK\_SciML\* (5FU)

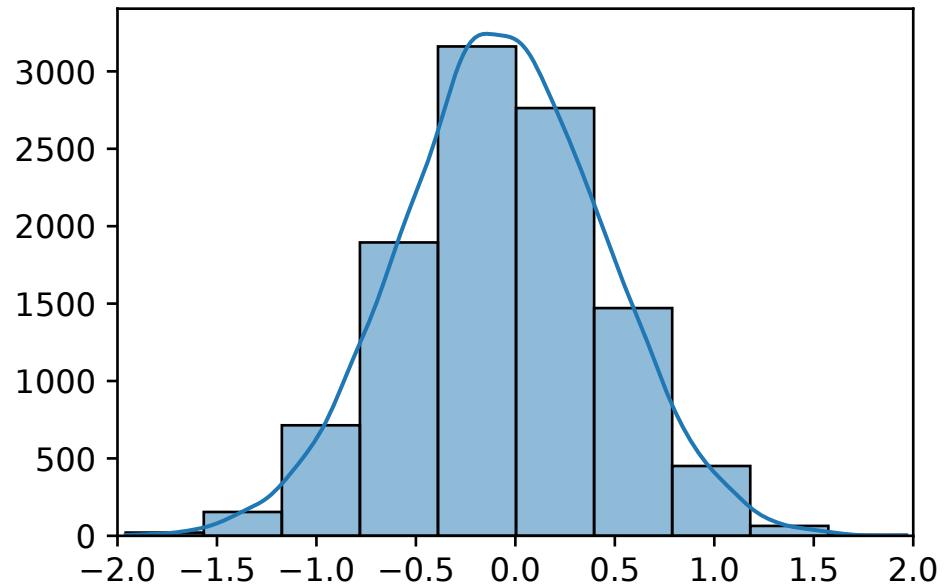

ETA CL MMPK\_SciML (Sunitib)

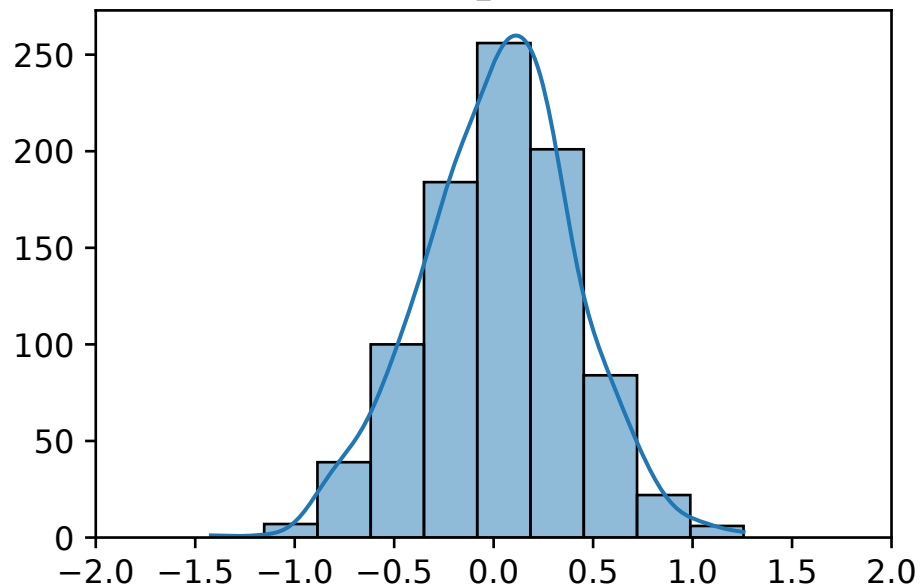

ETA V2 MMPK\_SciML (Sunitib)

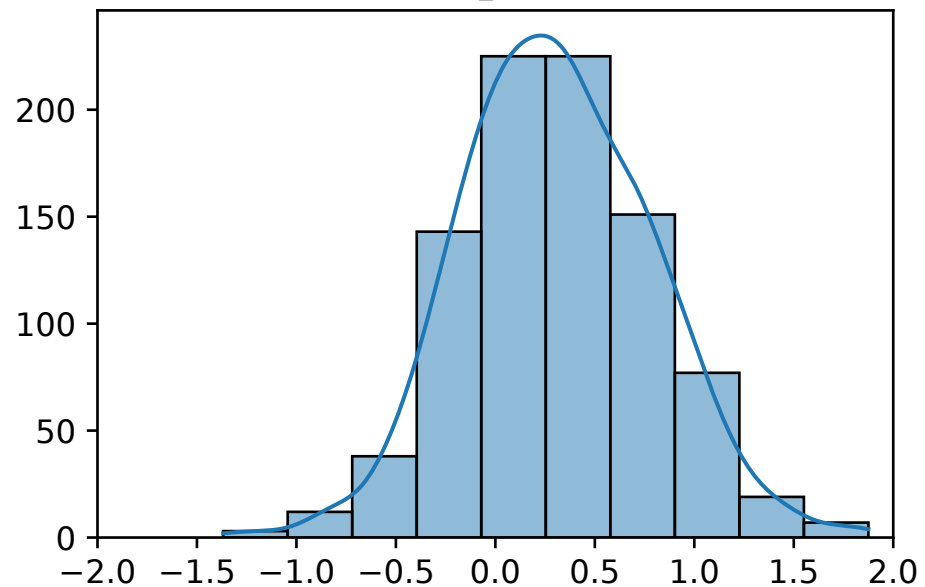

Supplement: Supplementary file [file media-2.pdf]
